# Supplementary material for: A Survey on Stretching Practices in Women and Men from Various Sports or Physical Activity Programs
Source: Int J Environ Res Public Health. 2021 Apr 8;18(8):3928. doi: 10.3390/ijerph18083928 (PMC8068839; doi:10.3390/ijerph18083928)
Supplement: Supplementary file 1 [file ijerph-18-03928-s001.pdf]

**Table S1.** Questionnaire used during the present study.

| Questions                                                                             | Responses                                                                                                                                                                               | Other Information                     |
|---------------------------------------------------------------------------------------|-----------------------------------------------------------------------------------------------------------------------------------------------------------------------------------------|---------------------------------------|
| Q1—What is your gender?                                                               | Women, Men                                                                                                                                                                              |                                       |
| Q2—What is your age?                                                                  | <20 years, 20–29 years, 30–39 years, 40–49 years, 50–59 years, >60 years                                                                                                                |                                       |
| Q3—What is the main sport you are actually doing?                                     | Team Sports, Fitness, Strength/crossfit, Track & Field, Cycling/Trail/Triathlon, Racket Sport, Dance/Gymnastics, Martial Arts, Swimming, Mountain/water sports, Equestrian/Golf, Others |                                       |
| Q4—What is your practice level?                                                       | National/international, Regional, Recreative                                                                                                                                            |                                       |
| Q5—What is your training volume?                                                      | <2 h/week, 3–6 h/week, 7–10 h/week, >10 h/week                                                                                                                                          |                                       |
| Q6—What is your subjective flexibility?                                               | Very low, Low, High, Very high                                                                                                                                                          |                                       |
| Q7—Do you already feel the necessity to do stretching exercises?                      | Yes, No                                                                                                                                                                                 |                                       |
| Q8—For what reason?                                                                   | Back pain, Joint pain, Muscle pain, Muscle stiffness, Range of motion, Wellness, Others                                                                                                 | If Q7 is yes<br>* multiple responses  |
| Q9—When?                                                                              | Before training, During training, After training/competition, After series of training/competition, Dedicated sessions                                                                  | If Q7 is yes<br>* multiple responses  |
| Q10—Did you conduct stretching exercises during the last two years?                   | Yes, No                                                                                                                                                                                 |                                       |
| Q11—For what reason?                                                                  | No time, No motivation, No information, no supervision, poor efficiency, others                                                                                                         | If Q10 is no<br>* multiple responses  |
| Q12—For what reason?                                                                  | Wellness, Warm-up, Injury prevention, Gain flexibility, Recovery, Health, Others                                                                                                        | If Q10 is yes<br>* multiple responses |
| Q13—When?                                                                             | Before training, During training, After training/competition, After series of training/competition, Dedicated sessions                                                                  | If Q10 is yes<br>* multiple responses |
| Q14—With what frequency?                                                              | Every day, During every training, 1 to 5 times a week, 1 to 2 times per month, 1 to 6 times per year                                                                                    | If Q10 is yes                         |
| Q15—What is the average duration of stretching exercises (total)?                     | <15 min, Between 15 and 30 min, Between 30 and 60 min, > 60 min                                                                                                                         | If Q10 is yes                         |
| Q16—What part of your body?                                                           | Lower, Upper, Both                                                                                                                                                                      | If Q10 is yes                         |
| Q17—Did you receive any information about stretching during your education?           | Yes, No                                                                                                                                                                                 |                                       |
| Q18—Did you look at some documentation to help you understand and perform stretching? | Yes, No                                                                                                                                                                                 |                                       |
| Q19—What is a type of documentation you obtained?                                     | Education, Coach/health professional, Conversation, Internet, Video, Books, Others                                                                                                      | If Q18 is yes<br>* multiple responses |
| Q20—Are stretching exercises supervised?                                              | Yes, No                                                                                                                                                                                 |                                       |
| Q21 - Who is the supervisor?                                                          | Other athletes, Coach, Health professional, Others                                                                                                                                      | If Q20 is yes<br>* multiple responses |
| Q22—Do you have instruction to perform stretching?                                    | Yes, No                                                                                                                                                                                 |                                       |
| Q23—Who are the people giving instruction?                                            | Other athletes, education, Coach, Health professional, Others                                                                                                                           | If Q22 is yes<br>* multiple responses |
| Q24—Do you know different stretching modalities?                                      | Yes, No                                                                                                                                                                                 |                                       |
| Q25—What stretching modality do you generally use?                                    | Active, Passive, Static, Dynamic, Ballistic, Oscillations, PNF, Contract-relax, Hold-relax, Others                                                                                      | If Q24 is yes<br>* multiple responses |
| Q26—What stretching modality do you use for performance?                              | Active, Passive, Static, Dynamic, Ballistic, Oscillations, PNF, Contract-relax, Hold-relax, Others                                                                                      | If Q24 is yes<br>* multiple responses |
| Q27—What stretching modality do you use for recovery?                                 | Active, Passive, Static, Dynamic, Ballistic, Oscillations, PNF, Contract-relax, Hold-relax, Others                                                                                      | If Q24 is yes<br>* multiple responses |
| Q28—What stretching modality do you use for wellness?                                 | Active, Passive, Static, Dynamic, Ballistic, Oscillations, PNF, Contract-relax, Hold-relax, Others                                                                                      | If Q24 is yes<br>* multiple responses |

|                                                                    |                                                                                                    |                                       |
|--------------------------------------------------------------------|----------------------------------------------------------------------------------------------------|---------------------------------------|
| Q29—What stretching modality do you use for flexibility?           | Active, Passive, Static, Dynamic, Ballistic, Oscillations, PNF, Contract-relax, Hold-relax, Others | If Q24 is yes<br>* multiple responses |
| Q30—Did you get injured during the last 12 months?                 | Yes, No                                                                                            |                                       |
| Q31—Do you think stretching more could have avoided being injured? | Yes, No, No opinion                                                                                | If Q30 is yes                         |
| Q32—Do you think stretching contribute to the absence of injury?   | Yes, No, Maybe                                                                                     | If Q30 is no                          |

**Table S2.** Effect sizes from Chi-square analyses (Cramer's V).

| Questions                                                                               | Gender | Practice Level |
|-----------------------------------------------------------------------------------------|--------|----------------|
| Q1 – What is your gender?                                                               | -      | 0.221          |
| Q2 – What is your age?                                                                  | 0.142  | 0.139          |
| Q3 – What is the main sport you are actually doing?                                     | 0.440  | 0.467          |
| Q4 – What is your practice level?                                                       | 0.221  | -              |
| Q5 – What is your training volume?                                                      | 0.149  | 0.294          |
| Q6 – What is your subjective flexibility?                                               | 0.212  | 0.101          |
| Q7 – Do you already feel the necessity to do stretching exercises?                      | 0.056  | 0.033          |
| Q8 – For what reason?                                                                   | 0.103  | 0.121          |
| Q9 – When?                                                                              | 0.094  | 0.067          |
| Q10 – Did you conduct stretching exercises during the last two years?                   | 0.027  | 0.097          |
| Q11 – For what reason?                                                                  | 0.019  | 0.039          |
| Q12 – For what reason?                                                                  | 0.075  | 0.071          |
| Q13 – When?                                                                             | 0.102  | 0.068          |
| Q14 – With what frequency?                                                              | 0.073  | 0.092          |
| Q15 – What is the average duration of stretching exercises (total)?                     | 0.05   | 0.105          |
| Q16 – What part of your body?                                                           | 0.144  | 0.085          |
| Q17 – Did you receive any information about stretching during your education?           | 0.136  | 0.049          |
| Q18 – Did you look at some documentation to help you understand and perform stretching? | 0.116  | 0.008          |
| Q19 – What is a type of documentation you obtained?                                     | 0.197  | 0.184          |
| Q20 – Are stretching exercises supervised?                                              | 0.128  | 0.172          |
| Q21 – Who is the supervisor?                                                            | 0.223  | 0.221          |
| Q22 – Do you have instruction to perform stretching?                                    | 0.008  | 0.062          |
| Q23 – Who are the people giving instruction?                                            | 0.206  | 0.198          |
| Q24 – Do you know different stretching modalities?                                      | 0.235  | 0.267          |
| Q25 – What stretching modality do you generally used?                                   | 0.066  | 0.087          |
| Q26 – What stretching modality do you use for performance?                              | 0.122  | 0.143          |
| Q27 – What stretching modality do you use for recovery?                                 | 0.085  | 0.076          |
| Q28 – What stretching modality do you use for wellness?                                 | 0.089  | 0.093          |
| Q29 – What stretching modality do you use for flexibility?                              | 0.144  | 0.139          |
| Q30 – Did you get injured during the last 12 months?                                    | 0.083  | 0.242          |
| Q31 – Do you think stretching more could have avoided being injured?                    | 0.105  | 0.069          |
| Q32 – Do you think stretching contribute to the absence of injury?                      | 0.078  | 0.041          |
